# 1                    **Imperfect Linkage Disequilibrium Generates**

## 2                    **Phantom Epistasis (& Perils of Big Data)**

3

4

5                    by

6

7

8                    G. de los Campos<sup>1\*</sup>, D. Sorensen<sup>2</sup> & M. A. Toro<sup>3</sup>,

9

10

11

12

13

14    1: Epidemiology & Biostatistics, Statistics & Probability departments, IQ-Institute for Quantitative  
15        Health Science and Engineering, Michigan State University;

16    2: Department of Molecular Biology and Genetics, Faculty of Science and Technology, Aarhus  
17        University.

18    3: Producción Animal, Universidad Politécnica de Madrid.

19

20    \*: Corresponding Author. 775 Woodlot Dr. (1311), East Lansing, MI, 48824  
21        (gustavoc@msu.edu )

22 **ABSTRACT.** The genetic architecture of complex human traits and diseases is affected by large  
23 number of possibly interacting genes, but detecting epistatic interactions can be challenging. In  
24 the last decade, several studies have alluded to problems that linkage disequilibrium can create  
25 when testing for epistatic interactions between DNA markers. However, these problems have  
26 not been formalized nor have their consequences been quantified in a precise manner. Here we  
27 use a conceptually simple three locus model involving a causal locus and two markers to show  
28 that imperfect LD can generate the illusion of epistasis, even when the underlying genetic  
29 architecture is purely additive. We describe necessary conditions for such “*phantom epistasis*” to  
30 emerge and quantify its relevance using simulations. Our empirical results demonstrate that  
31 phantom epistasis can be a very serious problem in GWAS studies (with rejection rates against  
32 the additive model greater than 0.2 for nominal p-values of 0.05, even when the model is purely  
33 additive). Some studies have sought to avoid this problem by only testing interactions between  
34 SNPs with  $R^2 < 0.1$ . We show that this threshold is not appropriate and demonstrate that the  
35 magnitude of the problem is even greater with large sample size. We conclude that caution must  
36 be exercised when interpreting GWAS results derived from very large data sets showing strong  
37 evidence in support of epistatic interactions between markers.

38

39 **Keywords:** epistasis, apparent epistasis, phantom epistasis, GWAS, linkage disequilibrium,  
40 imperfect LD, missing heritability, Big Data.

## 41 **Introduction**

42 A big challenge in genetics is to understand how variation at the DNA sequences translates into  
43 phenotypic variation. Genome-wide-association (GWA) studies address part of this challenge by  
44 testing for the association between phenotype (or a disease indicator) with genotype, one locus  
45 at a time. In the last decade, many GWA studies were conducted; these studies have reported  
46 thousands of SNP’s (single nucleotide polymorphism) associated to complex traits and diseases  
47 (<http://www.ebi.ac.uk/gwas>).

48 Recently, several studies in model organisms (e.g., Mackay 2014), humans (Strange, Ask, and  
49 Nielsen 2013) and agricultural species (e.g., Huang, Xu, and Cai 2014), have used genotype data

50 linked to phenotypes to investigate the presence of epistatic interactions between loci. Cordell  
51 (2002, 2009) and Wei, Hermani, and Haley (2014) provide comprehensive reviews of the methods  
52 commonly used to detect epistatic interactions.

53 There are several issues associated with studies aimed at detecting interactions, including  
54 matters of scale, the importance of the contribution of epistasis at the level of the genotype  
55 effects or at the level of the genotypic variance (e.g., Hill, Goddard, and Visscher 2008) and how  
56 an interaction detected in a linear statistical model may be associated to biological pathways that  
57 underlie a complex trait (e.g., Wang, Elston, and Zhu 2010; Aschard 2016). The latter becomes  
58 particularly problematic when the markers used to assess associations between SNPs and  
59 phenotypes (or a disease indicator) are in imperfect linkage disequilibrium (LD) with the alleles  
60 at the causal loci (i.e., those responsible for inter-individual genetic differences in a trait or  
61 disease phenotype). Under those conditions, evidence supporting the existence of a non-null  
62 interaction between markers do not necessarily provide definite evidence of epistasis at causal  
63 loci. Indeed, when the SNPs used in association analyses are in imperfect LD with the alleles at  
64 causal loci, linear regression on SNPs may lead to unaccounted variance, or *missing heritability*  
65 (e.g., Manolio et al. 2009; de los Campos, Sorensen, and Gianola 2015). Furthermore, the un-  
66 accounted additive signal may be correlated with interaction contrasts, thus creating the  
67 “illusion” of epistasis even for traits that are purely additive.

68 Several authors have expressed concerns about the role that LD can have on the detection of  
69 epistasis (e.g., Wei, Hermani, and Haley 2014). However, these problems have not been  
70 quantified nor have they been given a precise mathematical treatment. In this study, we present  
71 a simple three locus model involving a causal (unobserved) locus and two markers that makes  
72 explicit how *phantom epistasis* may emerge even in systems that are strictly additive. We use  
73 this model to derive a set of conditions that are necessary for the occurrence of phantom  
74 epistasis, and quantify the magnitude of the problem using simulations based on real human  
75 genotypes from the UK-Biobank. Our results suggest that imperfect LD can lead to seriously  
76 inflated type-I error rates. We also show that the rate of detection of phantom epistatic  
77 interactions increases with sample size; this should be considered when testing for epistatic  
78 interactions using big data sets such as the ones that are becoming available.

## 79 Materials and Methods

80 To study what factors may induce phantom epistasis we consider a simple model with three bi-  
 81 allelic loci. One of them, denoted as  $z_i$ , represents a causal locus (also referred as to the  
 82 ‘quantitative trait locus’, QTL) and has a direct effect on the expression of a phenotype  $y_i$ . The  
 83 other two loci, denoted as  $x_{1i}$  and  $x_{2i}$ , are markers that are possibly in LD with the QTL but have  
 84 no causal effect on  $y_i$ . For SNPs, a standard practice is to code genotypes ( $z_i, x_{1i}, x_{2i}$ ) by counting  
 85 at each of the loci the number of copies of a reference allele carried by the  $i^{\text{th}}$  individual. Here, to  
 86 facilitate the presentation we assume that genotypic codes and phenotypes are expressed as  
 87 deviations from their corresponding means; therefore  $E(z_i) = E(x_{1i}) = E(x_{2i}) = E(y_i) = 0$ . In  
 88 this setting, a single-locus strictly additive model takes the form

$$89 \quad y_i = z_i b + \delta_i, \quad [1]$$

90 where  $b$  is the additive effect of an allele substitution at locus  $z$ , and  $\delta_i$  is an error term. Evidently,  
 91 with only one causal locus there is no epistasis. We assume that [1] represents the causal model.  
 92 Next, suppose that an instrumental regression of the form

$$93 \quad y_i = x_{1i}\beta_1 + x_{2i}\beta_2 + x_{1i}x_{2i}\beta_{12} + \varepsilon_i \quad [2]$$

94 is used to investigate the presence of epistasis. Here, the  $\beta$ 's are regression coefficients that are  
 95 functions of the QTL effect ( $b$ ) and of the (multi-locus) LD involving the two markers and the QTL  
 96 genotypes. In the population, given the centered genotype codes, the regression coefficients  
 97 entering in the right-hand-side of [2] are

$$98 \quad \begin{bmatrix} \beta_1 \\ \beta_2 \\ \beta_{12} \end{bmatrix} = \begin{bmatrix} E(x_{1i}^2) & E(x_{1i}x_{2i}) & E(x_{1i}^2x_{2i}) \\ E(x_{1i}x_{2i}) & E(x_{2i}^2) & E(x_{1i}x_{2i}^2) \\ E(x_{1i}^2x_{2i}) & E(x_{1i}x_{2i}^2) & E(x_{1i}^2x_{2i}^2) \end{bmatrix}^{-1} \begin{bmatrix} E(y_ix_{1i}) \\ E(y_ix_{2i}) \\ E(y_ix_{1i}x_{2i}) \end{bmatrix}.$$

99 If the random residual  $\delta_i$  in expression [1] is orthogonal to the genotypes, then  $E(y_ix_{1i}) =$   
 100  $E(z_ix_{1i})b$ ,  $E(y_ix_{2i}) = E(z_ix_{2i})b$  and  $E(y_ix_{1i}x_{2i}) = E(z_ix_{1i}x_{2i})b$ . Thus, the population  
 101 regression coefficients are defined by

$$102 \quad \begin{bmatrix} \beta_1 \\ \beta_2 \\ \beta_{12} \end{bmatrix} = \begin{bmatrix} E(x_{1i}^2) & E(x_{1i}x_{2i}) & E(x_{1i}^2x_{2i}) \\ E(x_{1i}x_{2i}) & E(x_{2i}^2) & E(x_{1i}x_{2i}^2) \\ E(x_{1i}^2x_{2i}) & E(x_{1i}x_{2i}^2) & E(x_{1i}^2x_{2i}^2) \end{bmatrix}^{-1} \begin{bmatrix} E(z_ix_{1i}) \\ E(z_ix_{2i}) \\ E(z_ix_{1i}x_{2i}) \end{bmatrix} b. \quad [3]$$

103 This indicates that the regression coefficients of the instrumental model [2] are not only  
 104 functions of the QTL effect ( $b$ ) and of pair-wise (1<sup>st</sup> order) LD but also of higher order LD, e.g.,  
 105 joint disequilibrium at three loci,  $E(z_i x_{1i} x_{2i})$ . The moments involved in the right hand-side of [3]  
 106 are diploid genotypic measurements of LD. Under random mating these genotypic measures of  
 107 LD are equal to twice the standard haploid measures of LD (the  $D$ -coefficients for two and three  
 108 loci linkage disequilibrium; see Section 1 of the Supplementary Methods for further details).  
 109 In the population, the interaction effect  $\beta_{12}$  is given by a linear combination of two-loci LD  
 110 between each of the markers and the QTL and by three-loci LD involving the two markers and  
 111 the QTL:  $\beta_{12} = [t_{31}E(z_i x_{1i}) + t_{32}E(z_i x_{2i}) + t_{33}E(z_i x_{1i} x_{2i})]b$ . Here, the  $t$ 's are the entries of  
 112 the third row of the inverse of the coefficient matrix

$$113 \quad T^{-1} = \begin{bmatrix} E(x_{1i}^2) & E(x_{1i}x_{2i}) & E(x_{1i}^2x_{2i}) \\ E(x_{1i}x_{2i}) & E(x_{2i}^2) & E(x_{1i}x_{2i}^2) \\ E(x_{1i}^2x_{2i}) & E(x_{1i}x_{2i}^2) & E(x_{1i}^2x_{2i}^2) \end{bmatrix}^{-1}.$$

114 expressions to study the conditions that lead to a null interaction between markers.

### 115 **Conditions that lead to phantom epistasis**

116 Next, we describe sufficient conditions for  $\beta_{12} = 0$ . These sufficient conditions also imply  
 117 necessary conditions for phantom epistasis,  $\beta_{12} \neq 0$ , to emerge.

118 **Complete Linkage Equilibrium.** If the QTL is in LE with the two markers, then  $(z_i, x_{1i}, x_{2i}) =$   
 119  $p(z_i)p(x_{1i}, x_{2i})$ . Consequently,  $E(z_i x_{1i}) = E(x_{1i})E(z_i) = 0$ ,  $E(z_i x_{2i}) = E(x_{2i})E(z_i) = 0$ , and  
 120  $E(z_i x_{1i} x_{2i}) = E(x_{1i} x_{2i})E(z_i) = 0$ . Therefore, all elements of the right-hand-side of [3] are  
 121 equal to zero and, thus  $\beta_1 = \beta_2 = \beta_{12} = 0$ . Therefore, a first necessary condition for phantom  
 122 epistasis to emerge is that the QTL must be in LD with at least one of the SNPs.

123 **Perfect Linkage Disequilibrium.** On the other extreme, if there is perfect LD between the QTL  
 124 and the marker pair  $(x_{1i} x_{2i})$ , then the QTL genotype can be expressed as a linear function of the  
 125 two marker genotypes  $z_i = x_{1i}\beta_1 + x_{2i}\beta_2$ . In this case, a linear regression on the two markers  
 126 captures fully the QTL variance and therefore the interaction term will be equal to zero. (A  
 127 derivation of this intuitive result is presented section 2 of the Supplementary Methods.)  
 128 Therefore, perfect LD is a sufficient condition for  $\beta_{12} = 0$ . Consequently, a second necessary  
 129 condition for phantom epistasis to emerge is imperfect LD between the QTL and the marker pair.

130 This guarantees that some fraction of the QTL variance is not captured by linear regression on  
131 the two marker genotypes. Furthermore, if the left-out QTL signal is not orthogonal to the  
132 interaction contrast  $x_{1i}x_{2i}$ , then  $\beta_{12} \neq 0$ .

133 ***Independence of one of the markers prevents phantom epistasis.*** Consider now an  
134 intermediate case where one of the markers (say  $x_{2i}$ ) is independent of the pair formed by the  
135 QTL and the other marker ( $z_i, x_{1i}$ ). This implies that  $p(z_i, x_{1i}, x_{2i}) = p(z_i, x_{1i})p(x_{2i})$ . Under this  
136 condition, because the two markers are in LE, the coefficient matrix and its inverse ( $T^{-1}$ ) is  
137 diagonal; therefore,  $\beta_{12} = \frac{E(z_i x_{1i} x_{2i})}{E(x_{1i}^2 x_{2i}^2)} b$ . Moreover,  $E(z_i x_{1i} x_{2i}) = E(z_i x_{1i})E(x_{2i}) = 0$ , implying  
138 that  $\beta_{12} = 0$ . Therefore, a third necessary condition for phantom epistasis to emerge is that the  
139 three loci must be jointly in LD.

140 In summary, phantom epistasis can emerge if the three loci are in mutual but imperfect LD.

## 141 Simulation

142 The analytical results presented in the previous section indicates that multi-locus LD plays an  
143 important role in determining whether phantom epistasis may emerge. To shed light on the  
144 nature and the magnitude of the problem we conducted Monte Carlo simulations to assess how  
145 LD among the three genotypes ( $z_i, x_{1i}, x_{2i}$ ) affects the rates at which  $H_0: \beta_{12} = 0$  is rejected.  
146 Data were generated according to an additive model with a single causal locus that had strictly  
147 additive gene action (as in expression [1]) and then analyzed using an instrumental model such  
148 as the one in [2]. In this setting, rejection of  $H_0: \beta_{12} = 0$  is indicative of phantom epistasis.

149 Simulations were based on real human genotypes of distantly related white Caucasian  
150 individuals from the **UK-Biobank**, a cohort study consisting of about half a million participants  
151 aged between 40-69 years who were recruited in 2006-2010. The National Research Ethics  
152 Committee approved the study and informed consent was obtained from all participants. Study  
153 details are described elsewhere (Sudlow et al. 2015).

154 To avoid confounding due to population structure and long-range LD due to family  
155 relationships we focused on distantly related white Caucasian individuals. Therefore, we only  
156 considered subjects whose self-reported ethnicity was Caucasian and confirmed their genetic  
157 race/ethnicity using SNP-derived principal components. From these individuals, we identified

158 ~270,000 subjects that have pairwise genomic relationships,  $G_{ij} = p^{-1} \sum_{k=1}^p \frac{(x_{ik}-2\theta_k)(x_{jk}-2\theta_k)}{2\theta_k(1-\theta_k)}$ ,  
159 smaller than 0.03. Here,  $x_{ik}$  and  $x_{jk}$  are genotypes (coded as 0, 1, 2) at the  $k^{th}$  SNP of the  $i^{th}$   
160 and  $j^{th}$  individual, respectively, and  $\theta_k$  is the frequency of the allele counted at the  $k^{th}$  loci.  
161 Genomic relationships were computed using the *getG()* function of the BGData R-package  
162 (Grueneberg and de los Campos 2017).

163 **Genotypes** where from the Affymetrix UK BiLEVE Axiom and Affymetrix UK Biobank  
164 Axiom® arrays. Only SNPs with minor-allele-frequency greater than 0.1% and those with  
165 missing calling rate smaller than 3% were used for simulations. Furthermore, since we focused  
166 on a single locus model, we used only SNPs mapped to chromosome 1. There were 66,331 SNPs  
167 mapped to chromosome 1, of those, 45,866 passed our minor-allele frequency and calling rate  
168 inclusion criteria.

169 **Marker-QTL pairs.** The position of the QTL genotype  $z_i$  was determined by randomly  
170 choosing a marker position on chromosome 1. In a first simulation scenario, the two chosen  
171 markers were those flanking the QTL (i.e., those immediately adjacent to it). In subsequent  
172 simulation scenarios, the marker locus “to the right” ( $x_{2i}$ ) of the QTL  $z_i$  was placed at increasing  
173 base-pair lags from the QTL, whereas the marker locus to the left ( $x_{1i}$ ) of  $z_i$  remained always the  
174 most proximal marker “to the left of  $z_i$ ”. In this manner, the LD between one of the markers and  
175 the QTL was approximately constant whereas the LD between the distal marker,  $x_{2i}$ , and the  
176 marker-QTL pair ( $x_{1i}$ ,  $z_i$ ) decreased as base-pair distance between the two markers increased.  
177 For each simulation scenario, we conducted 10,000 Monte Carlo replicates with random  
178 assignment of the QTL position within chromosome 1.

179 **Phenotypes** were generated according to a single-locus additive model (expression [1]). with  
180 the QTL explaining one-half-of-one percent (0.005) of the phenotypic variance.

181 **Inferences** were based on a linear model such as that of expression [2] extended with  
182 inclusion of an intercept and the top 5 SNP-derived PCs, that is

$$183 \quad y_i = \mu + \sum_{j=1}^5 PC_{ji} \gamma_j + x_{1i} \beta_1 + x_{2i} \beta_2 + x_{1i} x_{2i} \beta_{12} + \varepsilon_i \quad [2b]$$

184 Principal components were included to avoid any confounding that may emerge from any  
185 remaining substructure that may have been present. The PCs used in [2b] were derived using 50K

186 SNPs evenly distributed in the entire genome. The model of expression [2b] was fitted via least  
187 squares using the `ls.fit()` function of R (R Development Core Team 2012). Then for each  
188 scenario and MC replicate we saved the p-value associated to the interaction term and counted  
189 the proportion of times that  $H_0: \beta_{12} = 0$  was rejected when using a significance level of 0.05.

190 **Genotypic measures of LD** between pairs of loci,  $R^2(x_1, x_2)$ ,  $R^2(x_1, z)$  and  $R^2(x_2, z)$ , were  
191 computed using the squared correlation between genotypes at the two loci. This information was  
192 stored for each MC replicate of each simulated scenario. The proportion of variance of the QTL  
193 genotype explained by linear regression on the two markers,  $R^2(z \sim x_1 + x_2)$ , was computed by  
194 Analysis of Variance, of a linear model where the QTL genotype was regressed, via least squares,  
195 on the two markers using a main effects additive model of the form:  $z_i = \mu + x_{1i}a_1 + x_{2i}a_2 +$   
196  $\varepsilon_i$ . The R-squared from this model was also saved for each MC replicate of each scenario and  
197 then used to analyze the relationship between this LD measure and the rate of rejection of  
198  $H_0: \beta_{12} = 0$ .

199 **Effect of sample size.** The power to detect a non-null interaction effect depends on two main  
200 factors: the proportion of variance explained by that interaction and sample size. The first factor  
201 is controlled in our simulation by controlling the distance between the QTL and the distal marker;  
202 this affects LD among the three loci and thus the size of the marker-interaction (see Methods).  
203 To assess the effect of sample size on inferences we carried out simulations using four different  
204 sample sizes: n=10K (K=1,000, this is representative of the size of a standard GWAS cohort) and  
205 n=50K, 100K and 250K (these sample sizes are more representative of modern large biomedical  
206 data sets).

207

## 208 **Data availability**

209 The genotypes used in the simulation were from the UK Biobank. Data was acquired under  
210 project identification number 15326. The data are available for all bonafide researchers and can  
211 be obtained by applying at <http://www.ukbiobank.ac.uk/register-apply/>. The Institutional  
212 Review Board (IRB) of Michigan State University has approved this research with the IRB number  
213 15-745.



## 214 Results

215 **Figure 1** shows measures of linkage disequilibrium between the three loci ( $z_i, x_{1i}, x_{2i}$ ) involved  
216 in the system. The average (across Monte Carlo replicates) proportion of variance of the QTL ( $z_i$ )  
217 explained by the most adjacent marker ( $x_{1i}$ ) averaged was about 0.085 (**Figure 1**); however, the  
218 distribution of this statistic is highly skewed. When  $x_{1i}$  and  $x_{2i}$  were the two flanking markers of  
219 the QTL, on average they jointly explained on average 15% of the QTL variance. Therefore, on  
220 average there was a sizable fraction of imperfect LD between the QTL and the markers. This leads  
221 to a sizable rate of “missing” heritability. The LD between  $x_{2i}$  and the pair ( $x_{1i}, z_i$ ) decreased as  
222 the distance between  $x_{2i}$  and the pair ( $x_{1i}, z_i$ ) increased. The R-sq. between  $x_{2i}$  and either the  
223 other marker or the QTL, falls very quickly for lags between 0-0.5Mb and reached near zero values  
224 at approximately 1 Mb (Figure 1).  
225

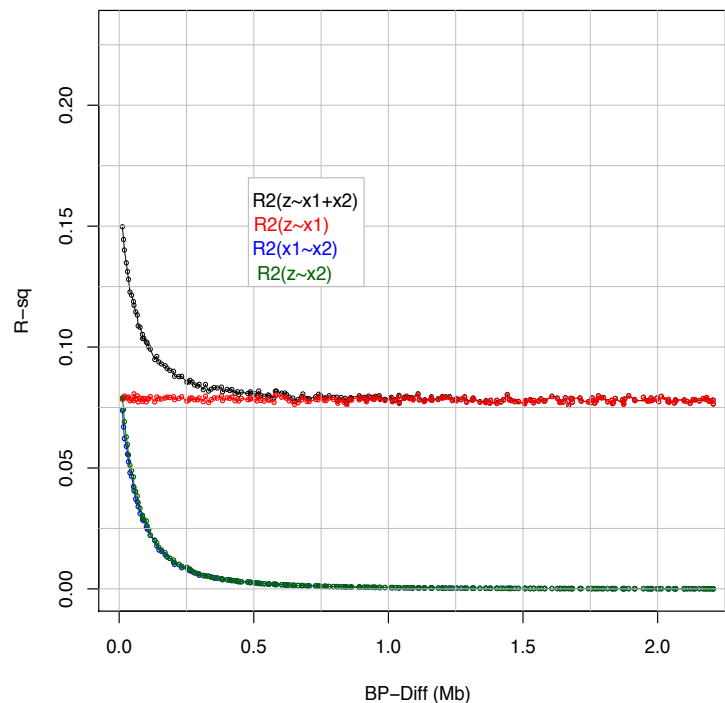

**Figure 1.** Average R-squared between pairs of loci and proportion of variance of the QTL genotype explained by the two markers,  $R^2(z_i \sim x_{1i} + x_{2i})$ , versus distance between the QTL ( $z_i$ ) and the distal marker ( $x_{2i}$ ). Marker  $x_{1i}$  was always adjacent to the QTL.

226

227 In our simulation rejection of  $H_0: \beta_{12} = 0$  was performed using a significance level of 0.05. **Figure**  
228 **2** displays the estimated rates of rejection by BP-distance between the QTL and the distal marker  
229 ( $x_{2i}$ ) and sample size. For the largest sample size, the curve relating empirical rejection rates with  
230 BP distance was clearly above 0.05 for distances of up to 2MB. The highest rejection rate was  
231 observed for  $n=250,000$  when  $x_{2i}$  and the QTL were at a distance of about 0.15 MB; here the  
232 empirical rejection rate was  $\sim 0.13$ —this is more than twice the value expected under the absence  
233 of phantom epistasis. The curves relating empirical rejection rates with physical distance reach  
234 the nominal rejection rate of 0.05 at  $\sim 1$  Mb for  $n=10,000$ ; however, for larger sample size the  
235 curves stayed above 0.05 even for distances longer than 1Mb.

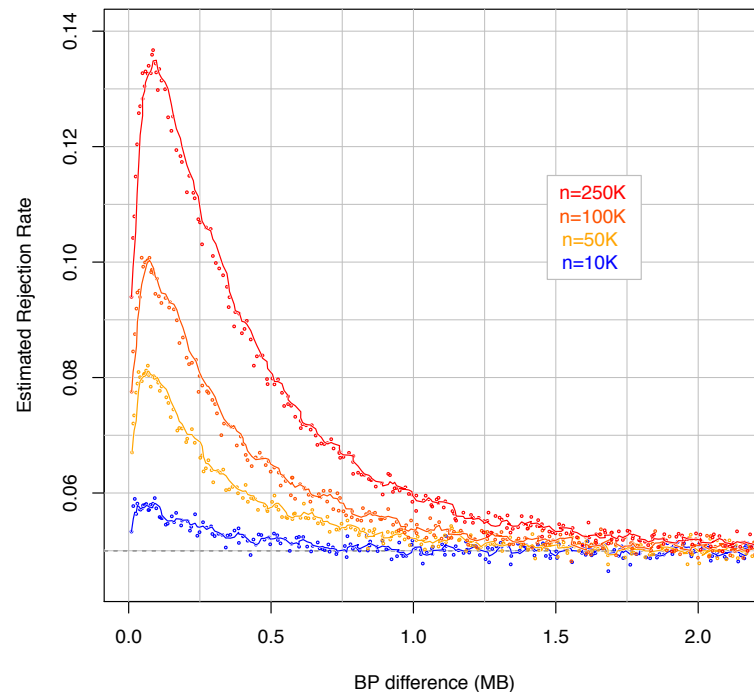

**Figure 2.** Estimated rejection rates versus distance between the QTL and the distal marker, by sample size. In the simulations one of the markers ( $x_{1i}$ ) was adjacent to the QTL ( $z_i$ ) and the other marker ( $x_{2i}$ ) was placed at increasing distance from the pair ( $x_{1i}, z_i$ ).

236

237

238 The extent of LD varies substantially along the genome; therefore, for a given BP distance some  
239 regions may have very weak LD while others may have, at the same distance, SNPs in moderate  
240 or high LD. **Figure 3** shows another way of viewing the simulation results displayed in **Figure 2**  
241 where the average rejection rate is calculated within bins of R-sq. between the two markers.  
242 When the two markers were un-correlated, rejection rates were very close to 0.05 indicating  
243 absence of phantom epistasis. However very small LD between the two markers generates  
244 considerably higher rejection rates: an  $R^2(x_{1i}, x_{2i}) \sim 0.1$  leads to rejection rates as high as 0.21  
245 with the largest sample size. The maximum rejection rates occur when the R-sq. between  
246 markers is between 0.1 to 0.2. Beyond this value in the range (0.2-0.9) rejection rates shows a  
247 linear decline.

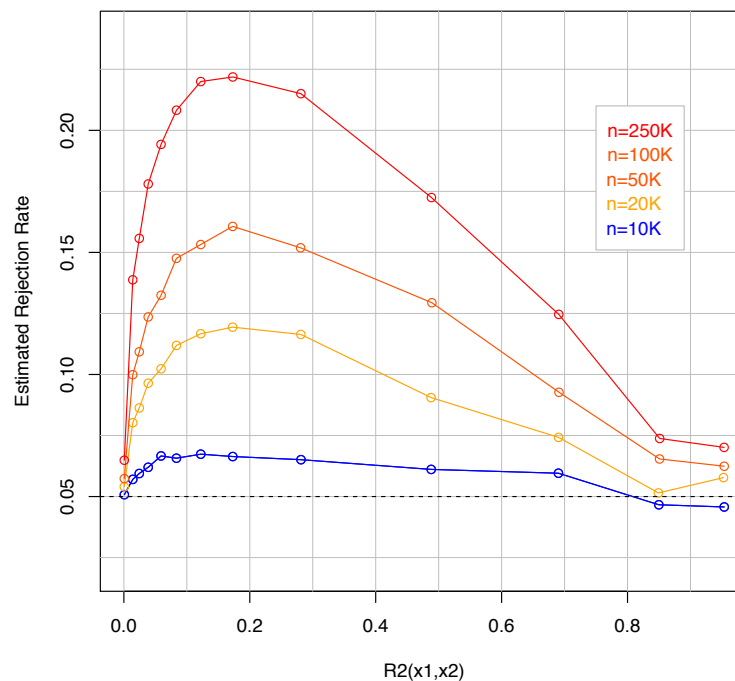

**Figure 3.** Estimated rejection rates by R-sq. between the two markers and sample size.

In the simulations one of the markers ( $x_{1i}$ ) was adjacent to the QTL ( $z_i$ ) and the other marker ( $x_{2i}$ ) was placed at increasing distance from the pair ( $z_i, x_{1i}$ ).

248

249

250 The results in Figures 2 and 3 are in line with the conceptual model described in the previous  
251 section. Analytically, the conditions needed for phantom epistasis to emerge include  
252 simultaneous but imperfect LD between the three loci. When the distal marker becomes  
253 independent of the QTL-proximal-marker pair, there is no phantom epistasis. This happens at  
254 about 2MB (Figure 2) and requires the R-sq. between the two markers to be very close to zero  
255 (Figure 3). When the LD between the QTL and the marker pair is very high but imperfect (e.g.  
256  $0.9 < R^2(z \sim x_1 + x_2) < 1$ ), some phantom epistasis is generated. However, for those R-sq.  
257 values the amount of signal that is not captured by the linear regression on the two markers and  
258 that can be recaptured by an interaction term involving both is small. Therefore, a very large  
259 sample size is required to detect the phantom epistasis (compare the empirical rejection rates in  
260 Figure 3 for R-sq. in the range 0.9-1).

## 261 Discussion

262 There is a substantial amount of literature reporting the presence of epistasis affecting complex  
263 traits but results, when scrutinized, have been controversial. Sometimes the controversy spawns  
264 from the suspicion that epistatic interactions may be capturing additive signals that were missed  
265 by the baseline additive model used to test interactions. For instance, Hermani et al. (2014)  
266 identified 30 pairs of SNPs that interact influencing gene expression and that were replicated  
267 across two independent studies. In a subsequent study (Wood et al. 2014) replicated many of the  
268 interactions reported by Hermani et al.; however, in each case, using sequence data, a single  
269 third variant could explain all the apparent epistasis. This happened even after removal of all  
270 pairs of SNPs with  $r^2 < 0.1$  which was suggested by Wei, Hermani, and Haley (2014) to minimize  
271 confounding due to “haplotype effects”.

272 However, the problem of why and under what conditions additive effects may generate  
273 “epistatic signals” has not been formalized. In this work, we use a simple three locus model to reveal  
274 the conditions that lead to phantom epistasis. We show that phantom epistasis emerges in the  
275 presence of simultaneous but imperfect mutual LD between the three loci (the QTL and the two  
276 markers involved in the interaction). This conceptually simple three loci model can be extended  
277 to more complex settings (e.g., multiple QTL-marker trios) without affecting the underlying

278 source of the principle: if additive QTL variance is imperfectly captured by linear regression on  
279 markers and the unexplained variation is not orthogonal to interaction contrasts, then phantom  
280 epistasis emerges.

281 **Testing interactions among weakly correlated SNPs only** (e.g., considering only SNP-pairs  
282 with  $r^2 < 0.1$ ) **is not a solution**. Our simulations demonstrate that phantom epistasis can  
283 emerge even when the two markers involved in the interaction are very weakly correlated. R-  
284 squared values greater than 0.05 or even smaller generate strong evidence of phantom epistasis  
285 particularly when sample size is large (Figure 3).

286 **Inferences under imperfect LD**. In a series of recent studies, we (de Los Campos et al. 2013;  
287 de los Campos, Sorensen, and Gianola 2015b; Gianola et al. 2015) and others (e.g., M E Goddard  
288 2009) have studied the role of imperfect LD on related inferential problems, including missing  
289 heritability (i.e., in generating a gap between the trait heritability and the amount of variance  
290 that can be captured by a SNP set) and whether imperfect LD can lead to estimates of genomic  
291 correlations between traits that are different than the underlying genetic correlations (Gianola  
292 et al. 2015). In all these cases, imperfect LD generates inferential difficulties; therefore, phantom  
293 epistasis should be seen as one of many issues arising when the markers used for inferences are  
294 in imperfect LD with causal variants.

295 **Perils of Big Data**. The power to detect a small non-null interaction between markers  
296 emerging from phantom epistasis increases with sample size. Our simulation results demonstrate  
297 this clearly: for pairwise R-sq. between markers of 0.1 there are clear signs of phantom epistasis;  
298 however, rejection rates are not highly elevated over the significance level when sample size was  
299 moderate (n=10k) because at that R-sq. the size of the interaction effect is small and therefore  
300 the power to detect such small interaction effect with moderate sample size is low. Big Data is a  
301 blessing for genomic analysis of complex traits; however, some problems cannot be addressed  
302 with larger sample size. Moreover, in some cases, large sample size can make an inferential  
303 problem even more problematic.

304 **Dominance can also contribute to phantom epistasis**. The conceptual and empirical  
305 model used in the simulation was based on a purely additive genetic architecture. In the  
306 presence of dominance, the true single-locus model becomes  $y_i = az_i + dz_i^2 + \delta_i$  where  $a$  and

307  $d$  are additive and dominance values, respectively. If the empirical model of expression [2] is used  
308 to test for epistatic interactions then the left-hand-side of expression [3] remains unchanged, but  
309 the right-hand-side becomes

$$310 \left[ \begin{pmatrix} E(x_{1i}z_i) \\ E(x_{2i}z_i) \\ E(x_{1i}x_{2i}z_i) \end{pmatrix} a + \begin{pmatrix} E(x_{1i}z_i^2) \\ E(x_{2i}z_i^2) \\ E(x_{1i}x_{2i}z_i^2) \end{pmatrix} d \right]$$

311 indicating that both dominance and additive effects can contribute to phantom epistasis. The  
312 conditions needed for phantom epistasis to emerge are similar to those under the pure additive  
313 model. These include, first, imperfect LD between  $(z_i, z_i^2)$  and the marker pair  $(x_{1i}, x_{2i})$  such that  
314 neither  $z_i$  nor  $z_i^2$  can be fully explained by a linear combination of the two markers. Secondly,  
315 phantom epistasis requires mutual LD at the three loci. If one of the markers (say  $x_{2i}$ ) is  
316 independent of the other-marker-QTL pair, then,  $E(x_{1i}x_{2i}z_i)a + E(x_{1i}x_{2i}z_i^2)d =$   
317  $E(x_{2i})[E(x_{1i}x_{2i}z_i)a + E(x_{1i}z_i^2)d] = 0$ .

318 **Local epistasis?** Several studies have reported results highlighting the importance of ‘local’  
319 epistatic interactions (e.g., Wei, Hermani, and Haley 2014; He et al. 2017). From a biological  
320 perspective it is plausible that multiple mutations in a gene may have collectively a larger impact  
321 than the simple sum of the effects of each mutation individually. And this could manifest as  
322 “haplotype effects” (e.g., Haig 2011). However, phantom epistasis provides an alternative  
323 explanation of why most of the epistatic interactions detected in GWAS occur between loci that  
324 are physically close. Indeed, we show analytically and empirically that LD between SNPs is  
325 required for phantom epistasis to appear, thus, phantom epistasis is expected to be  
326 predominantly a ‘local’ phenomena.

327 **The additive-non-additive conundrum.** Quantitative genetics studies properties of  
328 complex traits using regression analysis. In the field a careful distinction is made between  
329 observable and causal features of complex traits. For instance, it is well established that the  
330 linear regression of a phenotype on allele content yields estimates of the average effect of  
331 allele substitution and that both truly additive as well as dominance and epistatic effects can  
332 contribute to allele substitution effects. Furthermore, theoretical and empirical research has  
333 demonstrated that highly non-linear systems can generate signals that can often be

334 explained almost completely with a linear model (Hill, Goddard, and Visscher 2008). For this  
335 reason, in general, one cannot make causal statements about gene action from observational  
336 variance component analyses (e.g., W. Huang and T. F. C. Mackay, 2016). Complicating  
337 matters even further we show in this study that the opposite can happen: under a purely  
338 additive model, imperfect LD can generate non-additive signals!

339 The recognition that phantom epistasis may be an important phenomenon does not  
340 negate the relevance of gene-gene interactions at the causal level. It simply stresses the  
341 difficulties that one faces when trying to learn about causal features of a system using  
342 observational data and inputs (markers) which are proxies for the underlying variants that  
343 may have causal effects on traits.

344 ***Phantom epistasis: an opportunity to improve predictive performance?*** In this work  
345 we have stressed that imperfect LD can limit the possibility to learn about causal effects.  
346 However, linear and non-linear genomic regressions can be very powerful predictive machines,  
347 and it is well-established that the model that is best for inferences is not necessarily the best  
348 predictive tool. Phantom epistasis creates inferential problems but also opens opportunities for  
349 improving prediction models. Indeed, by capturing signals that are missed by an additive model,  
350 non-linear models using interactions between markers may increase the amount of genetic  
351 variance captured and improve prediction accuracy. This may explain, for instance why some  
352 non-linear models such as kernel regressions have shown better predictive performance than  
353 additive models, especially in breeding populations with long-span LD and low marker density  
354 (de los Campos et al. 2010).

355  
356 **Acknowledgments.** The authors thank the participants and the personnel in charge of  
357 generating, curating and maintaining the data of the UK Biobank. GDLC and DS received  
358 financial support from NIH Grants R01GM099992 and R01GM101219. MAT received  
359 financial support from Spain's Ministry of *Economía y Competitividad* (grant CGL2016-  
360 75904-C2-2-P, MT). This work was supported in part by Michigan State University through  
361 computational resources provided by the Institute for Cyber-Enabled Research. We  
362 presented early versions of this work in a genetics seminar in George August Universitat and

363 at the 2017 EAAP (European Federation of Animal Science) meetings. We are grateful for the  
364 comments received and would like to particularly thank the feedback offered by Johanes  
365 Martini.

## 366 Literature Cited

- 367
- 368 Aschard, H. 2016. “A Perspective on Interaction Effects in Genetic Association Studies.” *Genetic*  
369 *Epidemiology*. <https://doi.org/10.1002/gepi.21989>.
- 370 Bennett, J H. 1954. “On the Theory of Random Mating.” *Annals of Eugenics* 18 (4):311–17.  
371 <http://www.ncbi.nlm.nih.gov/pubmed/13148997>.
- 372 Cordell, H J. 2002. “Epistasis: What It Means, What It Doesn’t Mean, and Statistical Methods to  
373 Detect It in Humans.” *Human Molecular Genetics* 11:2463–68.
- 374 ——. 2009. “Detecting Gene-Gene Interactions That Underlie Human Diseases.” *Nature*  
375 *Reviews Genetics* 10:392–404.
- 376 Gianola, D., G. de los Campos, M. A. Toro, H. Naya, C.-C. Schon, and D. Sorensen. 2015. “Do  
377 Molecular Markers Inform About Pleiotropy?” *Genetics* 201 (1):23–29.  
378 <https://doi.org/10.1534/genetics.115.179978>.
- 379 Goddard, M E. 2009. “Genomic Selection: Prediction of Accuracy and Maximisation of Long  
380 Term Response.” *Genetica* 136:245–52.
- 381 Grueneberg, Alexander, and Gustavo de los Campos. 2017. “BGData: A Suite of R-Packages for  
382 Analysis of Big Genomic Data [v 1.0.0].” Comprehensive R Archive Network (CRAN).  
383 <https://cran.r-project.org/web/packages/BGData/index.html>.
- 384 Haig, D. 2011. “Does Heritability Hide in Epistasis between Linked SNPs?” *European Journal of*  
385 *Human Genetics* 19:123.
- 386 He, Sang, Jochen C. Reif, Viktor Korzun, Reiner Bothe, Erhard Ebmeyer, and Yong Jiang. 2017.  
387 “Genome-Wide Mapping and Prediction Suggests Presence of Local Epistasis in a Vast Elite  
388 Winter Wheat Populations Adapted to Central Europe.” *Theoretical and Applied Genetics*  
389 130 (4). Springer Berlin Heidelberg:635–47. <https://doi.org/10.1007/s00122-016-2840-x>.
- 390 Hermani, G, K Shakhbazov, H J Westra, T Esko, A K Henders, A F McRae, J Yang, et al. 2014.



- 391 “Detection and Replication of Epistasis Influencing Transcription in Humans.” *Nature* 508.  
392 Hill, W G, M E Goddard, and P M Visscher. 2008. “Data and Theory Point to Mainly Additive  
393 Genetic Variance for Complex Traits.” In *PLoS Genetics*.
- 394 Huang, A, S Xu, and X Cai. 2014. “Whole-Genome Quantitative Trait Locus Mapping Reveals  
395 Major Role of Epistasis on Yield of Rice.” *Plos One*.
- 396 los Campos, Gustavo de, Daniel Gianola, Guilherme J. M. Rosa, Kent A. Weigel, and José Crossa.  
397 2010. “Semi-Parametric Genomic-Enabled Prediction of Genetic Values Using Reproducing  
398 Kernel Hilbert Spaces Methods.” *Genetics Research* 92 (04). Cambridge University  
399 Press:295–308. <https://doi.org/10.1017/S0016672310000285>.
- 400 los Campos, Gustavo de, Daniel Sorensen, and Daniel Gianola. 2015a. “Genomic Heritability:  
401 What Is It?” Edited by Gregory S. Barsh. *PLOS Genetics* 11 (5):e1005048.  
402 <https://doi.org/10.1371/journal.pgen.1005048>.
- 403 ———. 2015b. “Genomic Heritability: What Is It?” Edited by Gregory S. Barsh. *PLOS Genetics* 11  
404 (5):e1005048. <https://doi.org/10.1371/journal.pgen.1005048>.
- 405 Los Campos, Gustavo de, Ana I Vazquez, Rohan Fernando, Yann C Klimentidis, and Daniel  
406 Sorensen. 2013. “Prediction of Complex Human Traits Using the Genomic Best Linear  
407 Unbiased Predictor.” Edited by Michael E. Goddard. *PLoS Genetics* 9 (7):e1003608.  
408 <https://doi.org/10.1371/journal.pgen.1003608>.
- 409 Mackay, Trudy F C. 2014. “Epistasis and Quantitative Traits: Using Model Organisms to Study  
410 Gene-Gene Interactions.” *Nature Reviews. Genetics* 15 (1):22–33.  
411 <https://doi.org/10.1038/nrg3627>.
- 412 Manolio, T A, F S Collins, N J Cox, D B Goldstein, L A Hindorff, D J Hunter, M I McCarthy, E M  
413 Ramos, L R Cardon, and \textitet. al. 2009. “Finding the Missing Heritability of Complex  
414 Diseases.” *Nature* 461:747–53.
- 415 R Development Core Team. 2012. “R: A Language and Environment for Statistical Computing.”  
416 Vienna, Austria. <http://www.r-project.org/>.
- 417 Strange, T, B Ask, and B Nielsen. 2013. “Genetic Parameters of the Piglet Mortality Traits  
418 Stillborn, Weak at Birth, Starvation, Crushing, and Miscellaneous in Crossbred Pigs.”

419            *Journal of Animal Science* 91:1562–69.

420    Sudlow, Cathie, John Gallacher, Naomi Allen, Valerie Beral, Paul Burton, John Danesh, Paul  
421            Downey, et al. 2015. “UK Biobank: An Open Access Resource for Identifying the Causes of a  
422            Wide Range of Complex Diseases of Middle and Old Age.” *PLoS Medicine* 12 (3). Public  
423            Library of Science:e1001779. <https://doi.org/10.1371/journal.pmed.1001779>.

424    Wang, X, R C Elston, and X Zhu. 2010. “The Meaning of Interaction.” *Human Heredity* 70:269–  
425            77.

426    Wei, W.-H., G Hermani, and C S Haley. 2014. “Detecting Epistasis in Human Complex Traits.”  
427            *Nature Reviews Genetics* 15:722–33.

428    Wood, R W, M A Tuke, M A Nalls, D G Hernandez, S Bandinelli, A B Singleton, D Melzer, L  
429            Ferrucci, T M Frayling, and M N Weedon. 2014. “Another Explanation for Apparent  
430            Epistasis.” *Nature* 508.

431

432

433

434

435

436

437

438

439

440

441

442

443

444

445

446

## Supplementary Methods

447

### 448 **1. Equivalence between genotype and haplotype measures of LD**

449 In this section we present the standard haplotype two- and three-loci measures of LD and  
 450 establish the connection between these measures and the genotype moments involved in  
 451 expression [3].

452 **Two-loci haplotype measure of LD.** Consider a pair of bi-allelic loci (A and B, with alleles  $A_1/A_2$   
 453 and  $B_1/B_2$ , respectively). The haplotype linkage disequilibrium parameter is  $D_{AB} = p(A_1, B_1) -$   
 454  $p(A_1)p(B_1)$ . Let  $X = 1$  when allele  $A_1$  is present and  $X = 0$  when allele  $A_2$  is present. Likewise,  
 455 let  $Y = 1$  when allele  $B_1$  is present and  $Y = 0$  when allele  $B_2$  is present. Then  $E(X) = p(A_1)$ ,  
 456  $E(Y) = p(B_1)$ ,  $E(XY) = p(A_1, B_1)$  and the covariance between  $X$  and  $Y$  is  $Cov(X, Y) =$   
 457  $E(XY) - E(X)E(Y)$  which reduces to  $D_{AB}$ , thus

$$458 \quad D_{AB} = Cov(X, Y) = E(XY) - E(X)E(Y)$$

459 If the two genotypes are centered, then  $E(X) = E(Y) = 0$  and

$$460 \quad D_{AB} = Cov(X, Y) = E(XY) \quad [4]$$

461 This is a haplotype analog of the 1<sup>st</sup> order measures of LD entering in expression [3].

462

463 **Three-loci haplotype measure of LD.** For a system involving three bi-allelic loci (A, B and C, with  
 464 alleles  $A_1/A_2$ ,  $B_1/B_2$ , and  $C_1/C_2$ , respectively) a three-loci haplotype measure of LD can be defined  
 465 as (Bennett 1954)

$$466 \quad D_{ABC} = p(A_1, B_1, C_1) - p(A_1)D_{BC} - p(B_1)D_{AC} - p(C_1)D_{AB} - p(A_1)p(B_1)p(C_1).$$

467 Extending the two-loci system by introduction of three binary random variables  $X$ ,  $Y$ , and  $Z$ , that  
 468 take values 1 when the allelic forms  $A_1$ ,  $B_1$  and  $C_1$  are present, respectively, and take values 0  
 469 otherwise, yields

$$470 \quad D_{ABC} = E(XYZ) - E(X)[E(YZ) - E(Y)E(Z)]$$

$$471 \quad \quad \quad -E(Y)[E(XZ) - E(X)E(Z)]$$

$$472 \quad \quad \quad -E(Z)[E(XY) - E(X)E(Y)]$$

$$473 \quad \quad \quad -E(X)E(Y)E(Z)$$

474 The three terms in square brackets represent pairwise disequilibria. When the three random  
475 variables are centered their marginal expectations are zero and the expression reduces to

$$476 \quad D_{ABC} = E(XYZ). \quad [5]$$

477 **Relationship with genotype measures of LD.** The disequilibria measures described above involve  
478 associations between alleles within gametes, whereas in the body of the paper, the expectations  
479 involve different genotypes. Assuming random mating, the expectations involving genotypes  
480 result in twice those involving gametes.

481

## 482 2. Perfect LD between markers and QTL prevents phantom epistasis

483 We demonstrate (the very intuitive result) that if a response ( $z_i$ ) can be fully captured by  
484 regression on a set of predictors ( $\mathbf{x}_i$ ), then the regression of  $z_i$  on  $\mathbf{x}_i$  plus  $\mathbf{w}_i$ ,

$$485 \quad z_i = \mathbf{x}_i' \mathbf{b}_X + \mathbf{w}_i' \mathbf{b}_W + \psi, \quad [6]$$

486 yields  $\mathbf{b}_W = \mathbf{0}$  in the population.

487 **Demonstration:** In the population, the regression coefficients of [6], are defined by the following  
488 system

$$489 \quad \begin{bmatrix} \Sigma_X & \Sigma_{XW} \\ \Sigma_{WX} & \Sigma_W \end{bmatrix} \begin{bmatrix} \mathbf{b}_X \\ \mathbf{b}_W \end{bmatrix} = \begin{bmatrix} \Sigma_{XZ} \\ \Sigma_{WZ} \end{bmatrix}$$

490 Where the  $\Sigma$ 's represent covariance matrices:  $\Sigma_X = Cov(\mathbf{x}_i, \mathbf{x}_i')$ ,  $\Sigma_W = Cov(\mathbf{w}_i, \mathbf{w}_i')$  and  
491  $\Sigma_{XW} = Cov(\mathbf{x}_i, \mathbf{w}_i') = \Sigma_{WX}$ . It follows that

$$492 \quad \Sigma_X \mathbf{b}_X + \Sigma_{XW} \mathbf{b}_W = \Sigma_{XZ} \quad [7]$$

493 and

$$494 \quad \Sigma_{WX} \mathbf{b}_X + \Sigma_W \mathbf{b}_W = \Sigma_{WZ}. \quad [8]$$

495 Solving [7] for  $\mathbf{b}_X$  yields  $\mathbf{b}_X = \Sigma_X^{-1}(\Sigma_{XZ} - \Sigma_{XW} \mathbf{b}_W)$ . Plugging this into [8] yields,

496  $\Sigma_{WX} \Sigma_X^{-1}(\Sigma_{XZ} - \Sigma_{XW} \mathbf{b}_W) + \Sigma_W \mathbf{b}_W = \Sigma_{WZ}$ . And solving for  $\mathbf{b}_W$  gives

$$497 \quad \mathbf{b}_W = [\Sigma_W - \Sigma_{WX} \Sigma_X^{-1} \Sigma_{XW}]^{-1} [\Sigma_{WZ} - \Sigma_{WX} \Sigma_X^{-1} \Sigma_{XZ}]. \quad [9]$$

498 Now if  $z_i$  can be fully explained by regression on  $\mathbf{x}_i$ , that is if  $z_i = \mathbf{x}_i' \mathbf{a}$ , with  $\mathbf{a} = \boldsymbol{\Sigma}_X^{-1} \boldsymbol{\Sigma}_{XZ}$ ,  
499 then,  $\boldsymbol{\Sigma}_{WZ} = Cov(\mathbf{w}_i, \mathbf{x}_i' \mathbf{a}) = \boldsymbol{\Sigma}_{WX} \mathbf{a} = \boldsymbol{\Sigma}_{WX} \boldsymbol{\Sigma}_X^{-1} \boldsymbol{\Sigma}_{XZ}$ , thus,  $[\boldsymbol{\Sigma}_{WZ} - \boldsymbol{\Sigma}_{WX} \boldsymbol{\Sigma}_X^{-1} \boldsymbol{\Sigma}_{XZ}] = \mathbf{0}$  and  
500 therefore,  $\mathbf{b}_W = \mathbf{0}$ . QED.

501 **Implication.** Let  $z_i$  be the QTL genotype,  $\mathbf{x}_i = (x_{1i}, x_{2i})'$  be a vector containing the two marker  
502 genotypes and  $\mathbf{w}_i = x_{1i}x_{2i}$  be the two-marker interaction contrast. Under perfect LD between  
503 the QTL and the markers the QTL genotype can be fully explained by linear regression on the two  
504 markers, that is  $z_i = \mathbf{x}_i' \mathbf{a}$ . Therefore, the above result ( $\mathbf{b}_W = \mathbf{0}$ ) implies  $\beta_{12} = 0$ , i.e., absence of  
505 phantom epistasis.

506
